# Supplementary material
Source: publisher figshare collection journal article supplement (https://tandf.figshare.com/ndownloader/files/13085924)
Supplement: Supplementary file 1 [file 13085924]

**Table S1. Top APtotal, APH’, APDFF and APdip from co-assembled DFF with dipeptide in water medium**

|  |  | APtotal | APH' | APDFF | APdip |
| --- | --- | --- | --- | --- | --- |
| 1 | SW | 2.37 | 0.22 | 1.84 | 1.34 |
| 2 | RF | 2.35 | 0.36 | 1.82 | 1.25 |
| 3 | KW | 2.30 | 0.37 | 1.76 | 1.25 |
| 4 | FR | 2.29 | 0.32 | 1.83 | 1.16 |
| 5 | FW | 2.19 | 0.02 | 1.49 | 1.47 |
| 6 | WF | 2.18 | 0.02 | 1.52 | 1.51 |
| 7 | YF | 2.17 | 0.10 | 1.70 | 1.34 |
| 8 | VW | 2.15 | 0.09 | 1.80 | 1.33 |
| 9 | KH | 2.15 | 0.39 | 2.20 | 1.18 |
| 10 | RW | 2.14 | 0.21 | 1.78 | 1.19 |
| 11 | WK | 2.14 | 0.26 | 1.75 | 1.21 |
| 12 | PW | 2.14 | 0.12 | 1.82 | 1.29 |
| 13 | WW | 2.10 | 0.00 | 1.50 | 1.46 |
| 14 | FL | 2.10 | 0.06 | 1.63 | 1.28 |
| 15 | FF | 2.09 | 0.04 | 1.47 | 1.57 |
| 16 | IW | 2.09 | 0.05 | 1.79 | 1.28 |
| 17 | VF | 2.09 | 0.10 | 1.78 | 1.28 |
| 18 | KF | 2.08 | 0.25 | 1.63 | 1.22 |
| 19 | YW | 2.07 | 0.06 | 1.68 | 1.32 |
| 20 | FM | 2.06 | 0.08 | 1.73 | 1.24 |
| 21 | CF | 2.06 | 0.11 | 1.68 | 1.27 |
| 22 | FY | 2.05 | 0.08 | 1.54 | 1.34 |
| 23 | TF | 2.04 | 0.12 | 1.69 | 1.28 |
| 24 | LW | 2.04 | 0.04 | 1.79 | 1.26 |
| 25 | IF | 2.04 | 0.06 | 1.70 | 1.28 |
| 26 | SK | 2.03 | 0.31 | 2.38 | 1.04 |
| 27 | FS | 2.03 | 0.12 | 1.62 | 1.24 |
| 28 | WY | 2.02 | 0.05 | 1.69 | 1.28 |
| 29 | SF | 2.00 | 0.11 | 1.64 | 1.26 |
| 30 | TW | 1.97 | 0.08 | 1.70 | 1.25 |
| 31 | KS | 1.97 | 0.26 | 2.21 | 1.05 |
| 32 | MF | 1.97 | 0.06 | 1.64 | 1.25 |
| 33 | WM | 1.96 | 0.05 | 1.70 | 1.23 |
| 34 | WC | 1.95 | 0.07 | 1.62 | 1.21 |
| 35 | PF | 1.95 | 0.08 | 1.71 | 1.25 |
| 36 | RT | 1.94 | 0.13 | 2.22 | 1.07 |
| 37 | FI | 1.94 | 0.04 | 1.58 | 1.31 |
| 38 | WV | 1.94 | 0.05 | 1.62 | 1.28 |
| 39 | CW | 1.94 | 0.07 | 1.67 | 1.22 |
| 40 | HW | 1.93 | 0.07 | 1.91 | 1.19 |
| 41 | FP | 1.93 | 0.08 | 1.59 | 1.25 |
| 42 | YK | 1.93 | 0.19 | 1.94 | 1.10 |
| 43 | FC | 1.93 | 0.08 | 1.57 | 1.24 |
| 44 | FV | 1.92 | 0.06 | 1.59 | 1.26 |
| 45 | WH | 1.92 | 0.07 | 1.69 | 1.20 |
| 46 | LF | 1.90 | 0.03 | 1.58 | 1.28 |
| 47 | RC | 1.89 | 0.16 | 2.10 | 1.02 |
| 48 | FH | 1.89 | 0.07 | 1.68 | 1.20 |
| 49 | FT | 1.89 | 0.07 | 1.56 | 1.19 |
| 50 | WR | 1.87 | 0.10 | 1.73 | 1.12 |
| 51 | FK | 1.86 | 0.13 | 1.49 | 1.16 |
| 52 | KY | 1.85 | 0.15 | 1.80 | 1.14 |
| 53 | KL | 1.84 | 0.13 | 1.99 | 1.05 |
| 54 | RV | 1.84 | 0.13 | 2.13 | 1.01 |
| 55 | YR | 1.84 | 0.12 | 1.90 | 1.07 |
| 56 | MW | 1.83 | 0.03 | 1.69 | 1.23 |
| 57 | WT | 1.83 | 0.05 | 1.59 | 1.22 |
| 58 | KT | 1.82 | 0.16 | 1.89 | 1.05 |
| 59 | WI | 1.81 | 0.02 | 1.64 | 1.25 |
| 60 | WL | 1.81 | 0.02 | 1.60 | 1.23 |
| 61 | RH | 1.80 | 0.12 | 1.91 | 1.14 |
| 62 | ST | 1.80 | 0.10 | 2.25 | 1.08 |
| 63 | WS | 1.80 | 0.05 | 1.53 | 1.20 |
| 64 | II | 1.79 | 0.04 | 2.02 | 1.10 |
| 65 | WP | 1.77 | 0.04 | 1.65 | 1.15 |
| 66 | IK | 1.77 | 0.10 | 2.08 | 1.02 |
| 67 | SR | 1.77 | 0.11 | 2.02 | 1.03 |
| 68 | RS | 1.76 | 0.11 | 2.02 | 1.03 |
| 69 | HK | 1.76 | 0.12 | 1.93 | 1.10 |
| 70 | TY | 1.76 | 0.06 | 1.95 | 1.09 |
| 71 | AW | 1.76 | 0.04 | 1.97 | 1.07 |
| 72 | KP | 1.76 | 0.12 | 2.00 | 1.01 |
| 73 | YI | 1.76 | 0.04 | 1.92 | 1.11 |
| 74 | RP | 1.75 | 0.10 | 2.13 | 1.01 |
| 75 | KI | 1.75 | 0.10 | 1.89 | 1.03 |
| 76 | KV | 1.75 | 0.11 | 1.93 | 1.02 |
| 77 | PK | 1.75 | 0.12 | 2.10 | 0.99 |
| 78 | RM | 1.74 | 0.08 | 2.11 | 1.02 |
| 79 | VR | 1.73 | 0.08 | 2.10 | 1.01 |
| 80 | VY | 1.73 | 0.05 | 2.11 | 1.05 |
| 81 | HF | 1.73 | 0.04 | 1.58 | 1.17 |
| 82 | SH | 1.73 | 0.10 | 1.98 | 1.16 |
| 83 | LI | 1.72 | 0.03 | 1.86 | 1.08 |
| 84 | LK | 1.72 | 0.08 | 1.99 | 1.01 |
| 85 | RI | 1.72 | 0.07 | 1.92 | 1.04 |
| 86 | GF | 1.72 | 0.05 | 1.84 | 1.05 |
| 87 | FQ | 1.71 | 0.04 | 1.71 | 1.11 |
| 88 | VV | 1.71 | 0.04 | 2.22 | 1.03 |
| 89 | SY | 1.71 | 0.05 | 1.87 | 1.13 |
| 90 | NW | 1.71 | 0.04 | 1.87 | 1.10 |
| 91 | RY | 1.71 | 0.07 | 1.72 | 1.11 |
| 92 | RL | 1.71 | 0.06 | 1.95 | 1.01 |
| 93 | LL | 1.70 | 0.02 | 2.01 | 1.07 |
| 94 | QF | 1.70 | 0.04 | 1.84 | 1.09 |
| 95 | HI | 1.70 | 0.04 | 2.17 | 1.06 |
| 96 | WG | 1.69 | 0.04 | 1.72 | 1.07 |
| 97 | RG | 1.69 | 0.09 | 2.05 | 0.98 |
| 98 | GA | 1.69 | 0.07 | 2.36 | 0.94 |
| 99 | KM | 1.69 | 0.08 | 1.88 | 1.01 |
| 100 | GW | 1.68 | 0.04 | 1.85 | 1.08 |
| 101 | VK | 1.68 | 0.08 | 1.98 | 1.01 |
| 102 | CR | 1.68 | 0.07 | 1.96 | 1.00 |
| 103 | SS | 1.68 | 0.06 | 1.97 | 1.08 |
| 104 | CL | 1.68 | 0.03 | 2.09 | 1.02 |
| 105 | NF | 1.67 | 0.04 | 1.87 | 1.06 |
| 106 | VI | 1.67 | 0.03 | 2.03 | 1.03 |
| 107 | TR | 1.66 | 0.07 | 1.94 | 1.03 |
| 108 | YY | 1.66 | 0.03 | 1.79 | 1.14 |
| 109 | CI | 1.66 | 0.03 | 2.04 | 1.03 |
| 110 | FA | 1.66 | 0.03 | 1.66 | 1.09 |
| 111 | PL | 1.65 | 0.03 | 2.05 | 1.03 |
| 112 | KR | 1.65 | 0.09 | 2.11 | 0.98 |
| 113 | YM | 1.65 | 0.03 | 1.85 | 1.10 |
| 114 | MR | 1.65 | 0.05 | 2.01 | 0.99 |
| 115 | SC | 1.65 | 0.05 | 1.99 | 1.02 |
| 116 | MY | 1.64 | 0.03 | 1.85 | 1.06 |
| 117 | IP | 1.64 | 0.03 | 2.03 | 1.03 |
| 118 | HS | 1.64 | 0.05 | 1.94 | 1.08 |
| 119 | YC | 1.64 | 0.03 | 1.91 | 1.05 |
| 120 | FN | 1.64 | 0.03 | 1.66 | 1.07 |
| 121 | WA | 1.64 | 0.02 | 1.64 | 1.08 |
| 122 | IR | 1.64 | 0.05 | 1.83 | 0.99 |
| 123 | KQ | 1.64 | 0.07 | 1.99 | 1.01 |
| 124 | LY | 1.63 | 0.02 | 1.91 | 1.08 |
| 125 | KA | 1.63 | 0.07 | 1.97 | 0.98 |
| 126 | CM | 1.63 | 0.03 | 2.15 | 1.01 |
| 127 | TS | 1.63 | 0.04 | 1.87 | 1.09 |
| 128 | TK | 1.63 | 0.06 | 1.95 | 1.02 |
| 129 | RR | 1.63 | 0.07 | 2.09 | 0.98 |
| 130 | MK | 1.63 | 0.06 | 1.88 | 1.00 |
| 131 | CT | 1.63 | 0.04 | 2.01 | 1.02 |
| 132 | IS | 1.62 | 0.03 | 2.01 | 1.02 |
| 133 | HC | 1.62 | 0.04 | 2.04 | 1.05 |
| 134 | HY | 1.62 | 0.03 | 1.86 | 1.10 |
| 135 | WQ | 1.62 | 0.02 | 1.59 | 1.10 |
| 136 | PY | 1.62 | 0.03 | 1.90 | 1.08 |
| 137 | YP | 1.62 | 0.03 | 1.85 | 1.03 |
| 138 | SL | 1.62 | 0.03 | 2.03 | 1.03 |
| 139 | PI | 1.61 | 0.03 | 1.92 | 1.04 |
| 140 | LH | 1.61 | 0.02 | 2.09 | 1.04 |
| 141 | CV | 1.61 | 0.03 | 2.03 | 1.01 |
| 142 | GK | 1.61 | 0.06 | 2.03 | 0.96 |
| 143 | LP | 1.61 | 0.02 | 1.98 | 1.01 |
| 144 | TH | 1.61 | 0.04 | 1.94 | 1.08 |
| 145 | TI | 1.61 | 0.03 | 2.10 | 1.01 |
| 146 | LR | 1.61 | 0.04 | 1.88 | 1.00 |
| 147 | RK | 1.60 | 0.07 | 1.98 | 0.99 |
| 148 | AF | 1.60 | 0.02 | 1.72 | 1.03 |
| 149 | KG | 1.60 | 0.06 | 1.88 | 0.98 |
| 150 | LC | 1.60 | 0.02 | 1.91 | 1.02 |
| 151 | LA | 1.60 | 0.03 | 2.26 | 0.98 |
| 152 | CH | 1.60 | 0.03 | 2.06 | 1.05 |
| 153 | IV | 1.60 | 0.02 | 1.94 | 1.04 |
| 154 | FG | 1.59 | 0.03 | 1.60 | 1.07 |
| 155 | ML | 1.59 | 0.02 | 2.04 | 1.01 |
| 156 | CS | 1.59 | 0.03 | 1.96 | 1.01 |
| 157 | CY | 1.59 | 0.02 | 1.70 | 1.09 |
| 158 | IT | 1.59 | 0.02 | 1.94 | 1.02 |
| 159 | KN | 1.59 | 0.05 | 1.95 | 1.00 |
| 160 | SM | 1.59 | 0.03 | 2.07 | 0.97 |
| 161 | KC | 1.59 | 0.05 | 1.67 | 1.02 |
| 162 | AK | 1.58 | 0.05 | 1.96 | 0.98 |
| 163 | YT | 1.58 | 0.03 | 1.75 | 1.08 |
| 164 | VL | 1.58 | 0.02 | 1.90 | 1.02 |
| 165 | TT | 1.58 | 0.03 | 1.94 | 1.04 |
| 166 | IC | 1.58 | 0.02 | 1.88 | 1.02 |
| 167 | CK | 1.58 | 0.05 | 1.79 | 1.00 |
| 168 | YH | 1.58 | 0.02 | 1.67 | 1.09 |
| 169 | VT | 1.58 | 0.03 | 1.96 | 1.01 |
| 170 | KK | 1.58 | 0.06 | 1.79 | 0.99 |
| 171 | TM | 1.57 | 0.02 | 2.08 | 0.99 |
| 172 | WN | 1.57 | 0.02 | 1.64 | 1.09 |
| 173 | TC | 1.57 | 0.03 | 1.90 | 1.01 |
| 174 | LV | 1.57 | 0.02 | 1.92 | 1.02 |
| 175 | TV | 1.57 | 0.02 | 1.95 | 1.03 |
| 176 | YL | 1.57 | 0.01 | 1.72 | 1.06 |
| 177 | LT | 1.57 | 0.02 | 1.98 | 1.01 |
| 178 | MA | 1.56 | 0.02 | 2.19 | 0.96 |
| 179 | TP | 1.56 | 0.03 | 2.06 | 1.01 |
| 180 | KD | 1.56 | 0.06 | 2.07 | 1.06 |
| 181 | YV | 1.56 | 0.02 | 1.78 | 1.06 |
| 182 | RA | 1.56 | 0.04 | 1.85 | 0.98 |
| 183 | HR | 1.56 | 0.04 | 1.73 | 1.05 |
| 184 | NK | 1.56 | 0.05 | 2.02 | 0.99 |
| 185 | YG | 1.56 | 0.03 | 1.97 | 1.01 |
| 186 | QS | 1.56 | 0.03 | 2.37 | 0.99 |
| 187 | GP | 1.56 | 0.03 | 2.12 | 0.99 |
| 188 | LM | 1.56 | 0.01 | 1.92 | 1.01 |
| 189 | IA | 1.56 | 0.02 | 2.08 | 0.98 |
| 190 | WE | 1.56 | 0.03 | 1.74 | 1.06 |
| 191 | MM | 1.55 | 0.02 | 2.02 | 1.01 |
| 192 | TA | 1.55 | 0.03 | 2.05 | 0.99 |
| 193 | PC | 1.55 | 0.02 | 1.92 | 1.00 |
| 194 | PT | 1.55 | 0.02 | 2.05 | 1.01 |
| 195 | QW | 1.55 | 0.02 | 1.83 | 1.05 |
| 196 | MH | 1.55 | 0.02 | 2.09 | 1.03 |
| 197 | IL | 1.55 | 0.01 | 1.78 | 1.03 |
| 198 | MP | 1.54 | 0.02 | 2.10 | 0.99 |
| 199 | TG | 1.54 | 0.03 | 2.05 | 1.00 |
| 200 | AC | 1.54 | 0.02 | 2.07 | 0.97 |
| 201 | VP | 1.54 | 0.02 | 1.94 | 1.01 |
| 202 | IM | 1.54 | 0.01 | 1.93 | 1.02 |
| 203 | AQ | 1.54 | 0.03 | 2.24 | 0.97 |
| 204 | WD | 1.54 | 0.03 | 1.66 | 1.10 |
| 205 | RD | 1.54 | 0.05 | 2.07 | 1.07 |
| 206 | SV | 1.54 | 0.02 | 1.94 | 1.01 |
| 207 | CG | 1.54 | 0.03 | 1.97 | 0.98 |
| 208 | GC | 1.54 | 0.03 | 2.08 | 0.98 |
| 209 | VH | 1.53 | 0.02 | 1.93 | 1.06 |
| 210 | MS | 1.53 | 0.02 | 1.97 | 0.98 |
| 211 | CC | 1.53 | 0.02 | 1.77 | 1.01 |
| 212 | PS | 1.53 | 0.02 | 1.93 | 1.01 |
| 213 | IY | 1.53 | 0.01 | 1.73 | 1.06 |
| 214 | HL | 1.53 | 0.01 | 2.02 | 1.03 |
| 215 | TQ | 1.53 | 0.02 | 2.11 | 1.00 |
| 216 | QK | 1.53 | 0.03 | 1.97 | 1.00 |
| 217 | RE | 1.53 | 0.04 | 2.10 | 1.06 |
| 218 | PV | 1.52 | 0.02 | 1.95 | 1.02 |
| 219 | PP | 1.52 | 0.02 | 1.90 | 1.01 |
| 220 | SI | 1.52 | 0.02 | 1.79 | 1.01 |
| 221 | CP | 1.52 | 0.02 | 1.90 | 1.01 |
| 222 | AA | 1.52 | 0.02 | 1.99 | 0.94 |
| 223 | AR | 1.52 | 0.03 | 1.89 | 0.98 |
| 224 | PR | 1.52 | 0.03 | 1.83 | 0.98 |
| 225 | PG | 1.51 | 0.02 | 2.05 | 0.97 |
| 226 | GG | 1.51 | 0.03 | 1.94 | 0.93 |
| 227 | MI | 1.51 | 0.01 | 1.90 | 0.99 |
| 228 | MV | 1.51 | 0.01 | 2.05 | 0.98 |
| 229 | PM | 1.51 | 0.01 | 1.97 | 0.98 |
| 230 | QC | 1.51 | 0.02 | 2.12 | 0.99 |
| 231 | YA | 1.51 | 0.02 | 1.86 | 1.01 |
| 232 | YS | 1.51 | 0.02 | 1.59 | 1.09 |
| 233 | VM | 1.51 | 0.01 | 1.91 | 0.99 |
| 234 | YQ | 1.50 | 0.02 | 1.90 | 1.02 |
| 235 | AM | 1.50 | 0.01 | 2.04 | 0.97 |
| 236 | QT | 1.50 | 0.02 | 2.13 | 1.00 |
| 237 | HH | 1.50 | 0.02 | 1.80 | 1.06 |
| 238 | RQ | 1.50 | 0.02 | 1.86 | 1.01 |
| 239 | GT | 1.50 | 0.02 | 1.98 | 1.00 |
| 240 | SN | 1.49 | 0.02 | 1.96 | 1.02 |
| 241 | AG | 1.49 | 0.02 | 1.89 | 0.96 |
| 242 | HA | 1.49 | 0.02 | 1.92 | 1.00 |
| 243 | AI | 1.49 | 0.01 | 1.99 | 0.97 |
| 244 | HG | 1.49 | 0.02 | 1.90 | 1.01 |
| 245 | LQ | 1.49 | 0.01 | 2.05 | 0.99 |
| 246 | QG | 1.49 | 0.02 | 2.10 | 0.98 |
| 247 | NL | 1.49 | 0.01 | 2.10 | 0.99 |
| 248 | IH | 1.49 | 0.01 | 1.77 | 1.04 |
| 249 | FD | 1.49 | 0.02 | 1.62 | 1.06 |
| 250 | KE | 1.49 | 0.03 | 1.91 | 1.05 |
| 251 | AL | 1.48 | 0.01 | 1.95 | 0.98 |
| 252 | VS | 1.48 | 0.01 | 1.77 | 1.01 |
| 253 | VC | 1.48 | 0.01 | 1.82 | 1.00 |
| 254 | YN | 1.48 | 0.01 | 1.89 | 1.01 |
| 255 | AP | 1.48 | 0.01 | 1.96 | 0.99 |
| 256 | LS | 1.48 | 0.01 | 1.74 | 1.01 |
| 257 | GL | 1.48 | 0.01 | 1.93 | 0.97 |
| 258 | CQ | 1.48 | 0.01 | 2.05 | 0.99 |
| 259 | SP | 1.48 | 0.01 | 1.80 | 1.00 |
| 260 | CA | 1.48 | 0.01 | 1.88 | 0.98 |
| 261 | NI | 1.48 | 0.01 | 2.04 | 1.00 |
| 262 | TL | 1.47 | 0.01 | 1.76 | 1.00 |
| 263 | AH | 1.47 | 0.01 | 2.01 | 1.01 |
| 264 | AD | 1.47 | 0.02 | 2.16 | 0.98 |
| 265 | GI | 1.47 | 0.01 | 1.90 | 0.99 |
| 266 | SA | 1.47 | 0.01 | 1.81 | 1.00 |
| 267 | MC | 1.47 | 0.01 | 1.83 | 0.98 |
| 268 | AV | 1.47 | 0.01 | 1.89 | 0.98 |
| 269 | QY | 1.47 | 0.01 | 2.05 | 1.01 |
| 270 | PQ | 1.47 | 0.01 | 2.03 | 1.00 |
| 271 | HT | 1.47 | 0.01 | 1.76 | 1.03 |
| 272 | GS | 1.47 | 0.01 | 1.86 | 1.00 |
| 273 | VA | 1.47 | 0.01 | 1.89 | 0.98 |
| 274 | NG | 1.46 | 0.02 | 1.98 | 0.99 |
| 275 | LG | 1.46 | 0.01 | 1.83 | 0.98 |
| 276 | AY | 1.46 | 0.01 | 1.87 | 1.00 |
| 277 | GR | 1.46 | 0.02 | 1.80 | 0.97 |
| 278 | TN | 1.46 | 0.01 | 1.96 | 1.00 |
| 279 | NY | 1.46 | 0.01 | 1.98 | 1.02 |
| 280 | RN | 1.46 | 0.02 | 1.80 | 0.99 |
| 281 | NR | 1.46 | 0.02 | 1.88 | 0.98 |
| 282 | HM | 1.46 | 0.01 | 1.77 | 1.04 |
| 283 | GQ | 1.46 | 0.01 | 2.00 | 0.97 |
| 284 | DA | 1.46 | 0.02 | 2.17 | 0.97 |
| 285 | HP | 1.45 | 0.01 | 1.83 | 0.99 |
| 286 | DF | 1.45 | 0.01 | 1.81 | 1.02 |
| 287 | GN | 1.45 | 0.01 | 1.96 | 0.98 |
| 288 | GV | 1.45 | 0.01 | 1.86 | 0.99 |
| 289 | EA | 1.45 | 0.02 | 2.23 | 0.95 |
| 290 | MT | 1.45 | 0.01 | 1.83 | 0.99 |
| 291 | QH | 1.45 | 0.01 | 2.05 | 1.02 |
| 292 | QP | 1.45 | 0.01 | 2.08 | 0.99 |
| 293 | LD | 1.45 | 0.01 | 2.09 | 1.00 |
| 294 | PE | 1.45 | 0.02 | 2.22 | 0.97 |
| 295 | QA | 1.44 | 0.01 | 1.95 | 0.97 |
| 296 | PN | 1.44 | 0.01 | 1.93 | 0.99 |
| 297 | HN | 1.44 | 0.01 | 1.89 | 1.02 |
| 298 | MN | 1.44 | 0.01 | 2.00 | 0.97 |
| 299 | HV | 1.44 | 0.01 | 1.72 | 1.04 |
| 300 | QN | 1.44 | 0.01 | 2.06 | 1.00 |
| 301 | NS | 1.44 | 0.01 | 1.87 | 1.01 |
| 302 | QR | 1.44 | 0.01 | 1.83 | 0.98 |
| 303 | VQ | 1.44 | 0.01 | 1.99 | 0.98 |
| 304 | NA | 1.44 | 0.01 | 1.92 | 0.97 |
| 305 | PA | 1.44 | 0.01 | 1.86 | 0.98 |
| 306 | QI | 1.43 | 0.01 | 1.98 | 0.99 |
| 307 | IN | 1.43 | 0.01 | 1.93 | 0.99 |
| 308 | CE | 1.43 | 0.01 | 2.11 | 0.98 |
| 309 | HQ | 1.43 | 0.01 | 1.83 | 1.04 |
| 310 | NV | 1.43 | 0.01 | 1.92 | 0.99 |
| 311 | VN | 1.43 | 0.01 | 1.94 | 0.98 |
| 312 | NM | 1.43 | 0.01 | 2.00 | 0.97 |
| 313 | SD | 1.43 | 0.01 | 1.98 | 1.02 |
| 314 | VG | 1.43 | 0.01 | 1.78 | 0.98 |
| 315 | VD | 1.43 | 0.01 | 1.98 | 0.99 |
| 316 | AT | 1.42 | 0.01 | 1.79 | 1.00 |
| 317 | QM | 1.42 | 0.01 | 2.00 | 0.99 |
| 318 | IQ | 1.42 | 0.01 | 1.90 | 0.99 |
| 319 | FE | 1.42 | 0.01 | 1.52 | 1.06 |
| 320 | PH | 1.42 | 0.01 | 1.66 | 1.06 |
| 321 | NN | 1.42 | 0.01 | 1.97 | 1.00 |
| 322 | CN | 1.42 | 0.01 | 1.86 | 0.98 |
| 323 | QD | 1.42 | 0.01 | 2.09 | 1.01 |
| 324 | TE | 1.41 | 0.01 | 1.99 | 1.02 |
| 325 | GM | 1.41 | 0.01 | 1.83 | 0.97 |
| 326 | SG | 1.41 | 0.01 | 1.72 | 1.00 |
| 327 | TD | 1.41 | 0.01 | 1.89 | 1.02 |
| 328 | QV | 1.41 | 0.01 | 1.91 | 1.00 |
| 329 | GH | 1.41 | 0.01 | 1.81 | 1.01 |
| 330 | AE | 1.41 | 0.01 | 1.98 | 0.97 |
| 331 | AN | 1.41 | 0.01 | 1.80 | 0.98 |
| 332 | HD | 1.40 | 0.01 | 1.96 | 1.04 |
| 333 | EM | 1.40 | 0.01 | 2.20 | 0.97 |
| 334 | HE | 1.40 | 0.01 | 1.97 | 1.03 |
| 335 | LN | 1.40 | 0.00 | 1.85 | 0.98 |
| 336 | GD | 1.40 | 0.01 | 1.91 | 0.98 |
| 337 | NC | 1.40 | 0.01 | 1.86 | 0.99 |
| 338 | DL | 1.40 | 0.01 | 2.09 | 0.99 |
| 339 | ER | 1.40 | 0.01 | 1.91 | 1.00 |
| 340 | GY | 1.40 | 0.00 | 1.72 | 0.99 |
| 341 | EV | 1.39 | 0.01 | 2.07 | 0.98 |
| 342 | DW | 1.39 | 0.01 | 1.72 | 1.03 |
| 343 | DV | 1.39 | 0.01 | 2.00 | 0.99 |
| 344 | ES | 1.39 | 0.01 | 2.03 | 0.98 |
| 345 | EF | 1.39 | 0.01 | 1.71 | 0.99 |
| 346 | NE | 1.39 | 0.01 | 2.09 | 0.97 |
| 347 | QQ | 1.39 | 0.01 | 1.96 | 0.99 |
| 348 | QL | 1.39 | 0.00 | 1.84 | 0.99 |
| 349 | EG | 1.39 | 0.01 | 2.01 | 0.96 |
| 350 | YD | 1.39 | 0.01 | 1.75 | 1.02 |
| 351 | SQ | 1.38 | 0.00 | 1.76 | 1.00 |
| 352 | ND | 1.38 | 0.01 | 1.99 | 1.00 |
| 353 | QE | 1.38 | 0.01 | 2.00 | 1.02 |
| 354 | NH | 1.38 | 0.00 | 1.83 | 1.04 |
| 355 | DP | 1.38 | 0.01 | 2.00 | 0.96 |
| 356 | EW | 1.38 | 0.00 | 1.76 | 1.01 |
| 357 | AS | 1.37 | 0.00 | 1.67 | 1.00 |
| 358 | YE | 1.37 | 0.00 | 1.69 | 1.03 |
| 359 | NT | 1.37 | 0.00 | 1.76 | 1.01 |
| 360 | VE | 1.37 | 0.00 | 1.90 | 0.98 |
| 361 | MG | 1.37 | 0.00 | 1.70 | 0.95 |
| 362 | MQ | 1.37 | 0.00 | 1.77 | 0.99 |
| 363 | DD | 1.36 | 0.01 | 2.04 | 0.98 |
| 364 | LE | 1.36 | 0.00 | 1.85 | 1.00 |
| 365 | IE | 1.36 | 0.00 | 1.85 | 0.98 |
| 366 | EY | 1.36 | 0.00 | 1.95 | 1.00 |
| 367 | PD | 1.36 | 0.00 | 1.78 | 0.99 |
| 368 | MD | 1.35 | 0.00 | 1.85 | 0.98 |
| 369 | IG | 1.35 | 0.00 | 1.64 | 0.97 |
| 370 | DR | 1.35 | 0.00 | 1.80 | 1.00 |
| 371 | EL | 1.35 | 0.00 | 1.98 | 0.98 |
| 372 | DS | 1.35 | 0.00 | 1.86 | 1.00 |
| 373 | ED | 1.35 | 0.00 | 2.03 | 0.97 |
| 374 | ID | 1.34 | 0.00 | 1.70 | 1.00 |
| 375 | DI | 1.34 | 0.00 | 1.88 | 0.98 |
| 376 | DN | 1.34 | 0.00 | 1.98 | 0.96 |
| 377 | DT | 1.34 | 0.00 | 1.80 | 1.00 |
| 378 | DK | 1.34 | 0.00 | 1.73 | 1.01 |
| 379 | DH | 1.34 | 0.00 | 1.93 | 1.01 |
| 380 | NP | 1.34 | 0.00 | 1.73 | 0.95 |
| 381 | DC | 1.34 | 0.00 | 1.88 | 0.99 |
| 382 | EI | 1.33 | 0.00 | 1.87 | 0.98 |
| 383 | NQ | 1.33 | 0.00 | 1.75 | 0.99 |
| 384 | DY | 1.33 | 0.00 | 1.85 | 1.00 |
| 385 | EH | 1.33 | 0.00 | 1.91 | 1.01 |
| 386 | DM | 1.33 | 0.00 | 1.87 | 0.96 |
| 387 | DG | 1.33 | 0.00 | 1.74 | 0.98 |
| 388 | GE | 1.33 | 0.00 | 1.75 | 0.97 |
| 389 | CD | 1.33 | 0.00 | 1.74 | 0.99 |
| 390 | ET | 1.32 | 0.00 | 1.76 | 0.98 |
| 391 | EQ | 1.31 | 0.00 | 1.82 | 0.99 |
| 392 | EE | 1.31 | 0.00 | 1.92 | 0.98 |
| 393 | DQ | 1.31 | 0.00 | 1.81 | 0.99 |
| 394 | SE | 1.31 | 0.00 | 1.71 | 1.01 |
| 395 | EP | 1.31 | 0.00 | 1.80 | 0.96 |
| 396 | DE | 1.29 | 0.00 | 1.86 | 0.96 |
| 397 | EN | 1.28 | 0.00 | 1.74 | 0.97 |
| 398 | EC | 1.28 | 0.00 | 1.76 | 0.95 |
| 399 | ME | 1.28 | 0.00 | 1.66 | 0.98 |
| 400 | EK | 1.28 | 0.00 | 1.61 | 0.99 |

**Table S2. Top APtotal, APDFF and APdip from co-assembled DFF with dipeptide in biphasic medium**

|  | Dip | APtotal | APDFF | APdip |
| --- | --- | --- | --- | --- |
| 1 | KW | 1.85 | 1.34 | 1.23 |
| 2 | TW | 1.83 | 1.34 | 1.24 |
| 3 | WW | 1.80 | 1.29 | 1.34 |
| 4 | SW | 1.78 | 1.38 | 1.25 |
| 5 | WS | 1.77 | 1.31 | 1.24 |
| 6 | KF | 1.76 | 1.36 | 1.17 |
| 7 | WF | 1.76 | 1.28 | 1.32 |
| 8 | FW | 1.73 | 1.28 | 1.30 |
| 9 | FY | 1.73 | 1.30 | 1.25 |
| 10 | FF | 1.72 | 1.33 | 1.30 |
| 11 | RF | 1.70 | 1.36 | 1.14 |
| 12 | IW | 1.70 | 1.38 | 1.24 |
| 13 | WI | 1.69 | 1.35 | 1.22 |
| 14 | WL | 1.69 | 1.33 | 1.21 |
| 15 | FI | 1.68 | 1.36 | 1.22 |
| 16 | VW | 1.68 | 1.34 | 1.22 |
| 17 | YY | 1.68 | 1.29 | 1.25 |
| 18 | HW | 1.67 | 1.30 | 1.26 |
| 19 | SF | 1.67 | 1.33 | 1.19 |
| 20 | YR | 1.67 | 1.42 | 1.09 |
| 21 | CF | 1.66 | 1.40 | 1.22 |
| 22 | WC | 1.66 | 1.30 | 1.18 |
| 23 | WT | 1.66 | 1.29 | 1.20 |
| 24 | WY | 1.65 | 1.25 | 1.25 |
| 25 | RW | 1.65 | 1.30 | 1.17 |
| 26 | HF | 1.65 | 1.30 | 1.21 |
| 27 | YW | 1.65 | 1.29 | 1.25 |
| 28 | WR | 1.64 | 1.31 | 1.15 |
| 29 | FL | 1.63 | 1.38 | 1.20 |
| 30 | FM | 1.63 | 1.37 | 1.18 |
| 31 | YV | 1.63 | 1.33 | 1.15 |
| 32 | YF | 1.63 | 1.27 | 1.26 |
| 33 | CW | 1.62 | 1.28 | 1.20 |
| 34 | WD | 1.62 | 1.39 | 1.11 |
| 35 | FH | 1.61 | 1.26 | 1.18 |
| 36 | KY | 1.61 | 1.35 | 1.13 |
| 37 | TY | 1.60 | 1.35 | 1.16 |
| 38 | WV | 1.60 | 1.30 | 1.19 |
| 39 | FC | 1.60 | 1.32 | 1.16 |
| 40 | LY | 1.60 | 1.34 | 1.15 |
| 41 | YT | 1.59 | 1.33 | 1.13 |
| 42 | WA | 1.59 | 1.36 | 1.09 |
| 43 | FS | 1.58 | 1.24 | 1.12 |
| 44 | IF | 1.58 | 1.34 | 1.20 |
| 45 | CY | 1.58 | 1.35 | 1.14 |
| 46 | SY | 1.58 | 1.36 | 1.16 |
| 47 | PW | 1.57 | 1.28 | 1.16 |
| 48 | WM | 1.57 | 1.30 | 1.18 |
| 49 | PY | 1.57 | 1.37 | 1.17 |
| 50 | MW | 1.57 | 1.32 | 1.18 |
| 51 | LK | 1.57 | 1.40 | 1.04 |
| 52 | YK | 1.56 | 1.40 | 1.09 |
| 53 | WG | 1.56 | 1.31 | 1.08 |
| 54 | VF | 1.56 | 1.30 | 1.18 |
| 55 | FR | 1.56 | 1.30 | 1.07 |
| 56 | PF | 1.56 | 1.32 | 1.19 |
| 57 | TF | 1.56 | 1.29 | 1.16 |
| 58 | HI | 1.56 | 1.37 | 1.14 |
| 59 | WH | 1.56 | 1.26 | 1.14 |
| 60 | YI | 1.55 | 1.30 | 1.18 |
| 61 | QW | 1.54 | 1.34 | 1.12 |
| 62 | YS | 1.54 | 1.34 | 1.13 |
| 63 | KH | 1.54 | 1.52 | 1.13 |
| 64 | WK | 1.54 | 1.26 | 1.13 |
| 65 | KI | 1.54 | 1.36 | 1.07 |
| 66 | MF | 1.53 | 1.33 | 1.19 |
| 67 | RL | 1.53 | 1.40 | 1.04 |
| 68 | LW | 1.53 | 1.31 | 1.18 |
| 69 | TT | 1.53 | 1.54 | 1.07 |
| 70 | FT | 1.53 | 1.28 | 1.14 |
| 71 | KV | 1.52 | 1.40 | 1.04 |
| 72 | HV | 1.52 | 1.37 | 1.10 |
| 73 | VY | 1.52 | 1.34 | 1.15 |
| 74 | AW | 1.51 | 1.32 | 1.10 |
| 75 | YP | 1.51 | 1.29 | 1.10 |
| 76 | FK | 1.51 | 1.30 | 1.08 |
| 77 | WP | 1.51 | 1.28 | 1.12 |
| 78 | RY | 1.51 | 1.37 | 1.10 |
| 79 | IY | 1.51 | 1.34 | 1.15 |
| 80 | RT | 1.51 | 1.55 | 1.04 |
| 81 | LL | 1.51 | 1.42 | 1.14 |
| 82 | YL | 1.51 | 1.34 | 1.15 |
| 83 | SH | 1.50 | 1.43 | 1.15 |
| 84 | MP | 1.50 | 1.40 | 1.08 |
| 85 | IV | 1.50 | 1.35 | 1.10 |
| 86 | NW | 1.50 | 1.32 | 1.17 |
| 87 | FN | 1.50 | 1.33 | 1.07 |
| 88 | IH | 1.50 | 1.35 | 1.12 |
| 89 | SI | 1.50 | 1.38 | 1.07 |
| 90 | VV | 1.50 | 1.40 | 1.12 |
| 91 | ST | 1.50 | 1.50 | 1.08 |
| 92 | FV | 1.49 | 1.26 | 1.12 |
| 93 | AF | 1.49 | 1.36 | 1.08 |
| 94 | TS | 1.49 | 1.49 | 1.07 |
| 95 | SL | 1.49 | 1.35 | 1.08 |
| 96 | RI | 1.49 | 1.38 | 1.03 |
| 97 | HY | 1.49 | 1.36 | 1.10 |
| 98 | LC | 1.49 | 1.35 | 1.08 |
| 99 | RC | 1.49 | 1.43 | 1.02 |
| 100 | HT | 1.49 | 1.49 | 1.08 |
| 101 | PS | 1.49 | 1.37 | 1.05 |
| 102 | WQ | 1.48 | 1.29 | 1.09 |
| 103 | YM | 1.48 | 1.30 | 1.12 |
| 104 | LI | 1.48 | 1.35 | 1.14 |
| 105 | SS | 1.48 | 1.46 | 1.09 |
| 106 | PC | 1.48 | 1.33 | 1.07 |
| 107 | WN | 1.48 | 1.31 | 1.08 |
| 108 | VT | 1.48 | 1.39 | 1.05 |
| 109 | CH | 1.48 | 1.38 | 1.06 |
| 110 | RH | 1.48 | 1.51 | 1.09 |
| 111 | TK | 1.47 | 1.51 | 1.03 |
| 112 | HP | 1.47 | 1.40 | 1.05 |
| 113 | KL | 1.47 | 1.33 | 1.06 |
| 114 | RS | 1.47 | 1.51 | 1.04 |
| 115 | LF | 1.47 | 1.33 | 1.16 |
| 116 | MH | 1.47 | 1.42 | 1.08 |
| 117 | YH | 1.47 | 1.30 | 1.13 |
| 118 | GW | 1.47 | 1.31 | 1.05 |
| 119 | FQ | 1.47 | 1.32 | 1.09 |
| 120 | PT | 1.46 | 1.41 | 1.04 |
| 121 | FG | 1.46 | 1.29 | 1.07 |
| 122 | RV | 1.46 | 1.39 | 1.03 |
| 123 | CP | 1.46 | 1.33 | 1.07 |
| 124 | KC | 1.46 | 1.37 | 1.04 |
| 125 | PP | 1.46 | 1.36 | 1.10 |
| 126 | ML | 1.46 | 1.36 | 1.09 |
| 127 | SV | 1.46 | 1.34 | 1.06 |
| 128 | RM | 1.46 | 1.39 | 1.03 |
| 129 | KP | 1.46 | 1.37 | 1.03 |
| 130 | MM | 1.46 | 1.38 | 1.05 |
| 131 | LS | 1.46 | 1.35 | 1.05 |
| 132 | KS | 1.45 | 1.45 | 1.04 |
| 133 | LP | 1.45 | 1.36 | 1.13 |
| 134 | PI | 1.45 | 1.35 | 1.12 |
| 135 | TH | 1.45 | 1.49 | 1.09 |
| 136 | CI | 1.45 | 1.31 | 1.08 |
| 137 | PM | 1.45 | 1.33 | 1.06 |
| 138 | NF | 1.45 | 1.32 | 1.08 |
| 139 | SK | 1.45 | 1.45 | 1.04 |
| 140 | MY | 1.45 | 1.29 | 1.12 |
| 141 | YC | 1.45 | 1.28 | 1.11 |
| 142 | FA | 1.44 | 1.31 | 1.06 |
| 143 | CL | 1.44 | 1.33 | 1.08 |
| 144 | IC | 1.44 | 1.30 | 1.07 |
| 145 | HR | 1.44 | 1.46 | 1.07 |
| 146 | FP | 1.44 | 1.29 | 1.07 |
| 147 | HC | 1.44 | 1.37 | 1.07 |
| 148 | VS | 1.44 | 1.32 | 1.06 |
| 149 | CC | 1.44 | 1.33 | 1.06 |
| 150 | IS | 1.44 | 1.33 | 1.07 |
| 151 | GY | 1.44 | 1.46 | 1.02 |
| 152 | MV | 1.44 | 1.32 | 1.07 |
| 153 | KM | 1.44 | 1.39 | 1.02 |
| 154 | VC | 1.43 | 1.35 | 1.07 |
| 155 | LH | 1.43 | 1.31 | 1.09 |
| 156 | KT | 1.43 | 1.43 | 1.05 |
| 157 | CM | 1.43 | 1.36 | 1.07 |
| 158 | LR | 1.43 | 1.37 | 1.00 |
| 159 | TR | 1.43 | 1.47 | 1.02 |
| 160 | TL | 1.42 | 1.34 | 1.06 |
| 161 | VH | 1.42 | 1.30 | 1.08 |
| 162 | PV | 1.42 | 1.35 | 1.09 |
| 163 | GF | 1.42 | 1.32 | 1.08 |
| 164 | HL | 1.42 | 1.30 | 1.07 |
| 165 | PR | 1.42 | 1.34 | 1.00 |
| 166 | VM | 1.42 | 1.32 | 1.08 |
| 167 | VL | 1.42 | 1.34 | 1.11 |
| 168 | LT | 1.42 | 1.34 | 1.05 |
| 169 | PH | 1.42 | 1.30 | 1.08 |
| 170 | LM | 1.42 | 1.38 | 1.06 |
| 171 | TI | 1.42 | 1.33 | 1.04 |
| 172 | II | 1.42 | 1.34 | 1.10 |
| 173 | SR | 1.42 | 1.44 | 1.02 |
| 174 | PK | 1.41 | 1.33 | 1.02 |
| 175 | SC | 1.41 | 1.35 | 1.03 |
| 176 | WE | 1.41 | 1.32 | 1.08 |
| 177 | CV | 1.41 | 1.31 | 1.06 |
| 178 | VI | 1.41 | 1.34 | 1.11 |
| 179 | IR | 1.41 | 1.32 | 1.02 |
| 180 | MK | 1.41 | 1.37 | 1.00 |
| 181 | IL | 1.41 | 1.32 | 1.08 |
| 182 | MS | 1.40 | 1.38 | 1.02 |
| 183 | CS | 1.40 | 1.35 | 1.05 |
| 184 | TP | 1.40 | 1.33 | 1.05 |
| 185 | RP | 1.40 | 1.39 | 1.00 |
| 186 | GI | 1.40 | 1.41 | 1.00 |
| 187 | TV | 1.40 | 1.36 | 1.05 |
| 188 | SM | 1.39 | 1.39 | 1.01 |
| 189 | SP | 1.39 | 1.31 | 1.04 |
| 190 | KA | 1.39 | 1.49 | 0.99 |
| 191 | KQ | 1.39 | 1.55 | 1.01 |
| 192 | IP | 1.39 | 1.30 | 1.07 |
| 193 | IM | 1.38 | 1.32 | 1.08 |
| 194 | FD | 1.38 | 1.32 | 1.07 |
| 195 | QF | 1.38 | 1.29 | 1.08 |
| 196 | MC | 1.38 | 1.31 | 1.03 |
| 197 | EW | 1.38 | 1.34 | 1.03 |
| 198 | PL | 1.38 | 1.32 | 1.13 |
| 199 | MI | 1.38 | 1.31 | 1.07 |
| 200 | CG | 1.38 | 1.42 | 0.99 |
| 201 | TM | 1.38 | 1.37 | 1.02 |
| 202 | IT | 1.37 | 1.31 | 1.04 |
| 203 | QL | 1.37 | 1.44 | 1.01 |
| 204 | HM | 1.37 | 1.34 | 1.07 |
| 205 | FE | 1.37 | 1.33 | 1.06 |
| 206 | NI | 1.37 | 1.45 | 1.01 |
| 207 | YN | 1.37 | 1.40 | 1.01 |
| 208 | IK | 1.37 | 1.28 | 1.01 |
| 209 | LV | 1.37 | 1.33 | 1.06 |
| 210 | VK | 1.37 | 1.31 | 1.01 |
| 211 | KK | 1.37 | 1.46 | 1.00 |
| 212 | SD | 1.37 | 1.60 | 1.04 |
| 213 | RG | 1.36 | 1.47 | 0.99 |
| 214 | NY | 1.36 | 1.41 | 1.04 |
| 215 | MT | 1.36 | 1.34 | 1.01 |
| 216 | DW | 1.36 | 1.29 | 1.04 |
| 217 | AG | 1.36 | 1.55 | 0.95 |
| 218 | HK | 1.36 | 1.36 | 1.06 |
| 219 | TG | 1.36 | 1.52 | 1.00 |
| 220 | VP | 1.36 | 1.28 | 1.07 |
| 221 | HS | 1.36 | 1.44 | 1.07 |
| 222 | TC | 1.36 | 1.31 | 1.02 |
| 223 | MR | 1.36 | 1.38 | 0.99 |
| 224 | CK | 1.36 | 1.34 | 1.01 |
| 225 | YA | 1.36 | 1.32 | 1.03 |
| 226 | VG | 1.36 | 1.41 | 1.00 |
| 227 | RR | 1.36 | 1.50 | 0.99 |
| 228 | AL | 1.36 | 1.41 | 1.00 |
| 229 | SA | 1.36 | 1.50 | 1.01 |
| 230 | CT | 1.35 | 1.30 | 1.03 |
| 231 | KG | 1.35 | 1.45 | 0.98 |
| 232 | KD | 1.35 | 1.49 | 1.08 |
| 233 | RA | 1.35 | 1.47 | 0.99 |
| 234 | CR | 1.35 | 1.32 | 0.98 |
| 235 | KN | 1.35 | 1.48 | 1.01 |
| 236 | YQ | 1.35 | 1.30 | 1.05 |
| 237 | TD | 1.35 | 1.53 | 1.02 |
| 238 | LN | 1.34 | 1.39 | 1.00 |
| 239 | TA | 1.34 | 1.49 | 1.00 |
| 240 | IA | 1.34 | 1.40 | 0.99 |
| 241 | GL | 1.34 | 1.41 | 0.99 |
| 242 | KR | 1.34 | 1.46 | 1.00 |
| 243 | DF | 1.34 | 1.34 | 1.03 |
| 244 | ID | 1.34 | 1.40 | 1.00 |
| 245 | MG | 1.34 | 1.44 | 0.97 |
| 246 | SN | 1.34 | 1.48 | 1.02 |
| 247 | NM | 1.34 | 1.47 | 0.99 |
| 248 | AV | 1.34 | 1.43 | 0.99 |
| 249 | QV | 1.34 | 1.42 | 1.00 |
| 250 | CE | 1.34 | 1.54 | 0.99 |
| 251 | IE | 1.34 | 1.45 | 0.99 |
| 252 | VR | 1.33 | 1.33 | 1.01 |
| 253 | GA | 1.33 | 1.50 | 0.94 |
| 254 | IQ | 1.33 | 1.35 | 1.03 |
| 255 | AK | 1.33 | 1.49 | 0.98 |
| 256 | YG | 1.33 | 1.30 | 1.02 |
| 257 | NR | 1.33 | 1.53 | 0.99 |
| 258 | QY | 1.33 | 1.38 | 1.03 |
| 259 | VE | 1.33 | 1.45 | 1.01 |
| 260 | IG | 1.33 | 1.36 | 1.00 |
| 261 | TN | 1.33 | 1.46 | 1.02 |
| 262 | NV | 1.33 | 1.43 | 1.00 |
| 263 | PG | 1.33 | 1.39 | 0.99 |
| 264 | GK | 1.33 | 1.49 | 0.97 |
| 265 | AD | 1.32 | 1.54 | 0.99 |
| 266 | HH | 1.32 | 1.41 | 1.06 |
| 267 | GP | 1.32 | 1.41 | 0.99 |
| 268 | GS | 1.32 | 1.47 | 0.99 |
| 269 | AP | 1.32 | 1.39 | 1.00 |
| 270 | AY | 1.32 | 1.35 | 1.02 |
| 271 | LG | 1.32 | 1.34 | 0.99 |
| 272 | HA | 1.32 | 1.46 | 1.01 |
| 273 | VN | 1.32 | 1.40 | 1.02 |
| 274 | VA | 1.32 | 1.39 | 0.99 |
| 275 | KE | 1.31 | 1.44 | 1.07 |
| 276 | EF | 1.31 | 1.33 | 1.04 |
| 277 | LA | 1.31 | 1.35 | 0.99 |
| 278 | AI | 1.31 | 1.35 | 1.01 |
| 279 | NT | 1.31 | 1.51 | 1.02 |
| 280 | CA | 1.31 | 1.39 | 0.98 |
| 281 | GV | 1.31 | 1.39 | 0.98 |
| 282 | NL | 1.31 | 1.38 | 1.01 |
| 283 | QC | 1.31 | 1.46 | 0.99 |
| 284 | TE | 1.31 | 1.52 | 1.02 |
| 285 | AC | 1.31 | 1.42 | 0.98 |
| 286 | YD | 1.31 | 1.32 | 1.03 |
| 287 | QM | 1.30 | 1.48 | 0.99 |
| 288 | PN | 1.30 | 1.38 | 1.00 |
| 289 | RK | 1.30 | 1.41 | 0.99 |
| 290 | AT | 1.30 | 1.45 | 1.01 |
| 291 | GG | 1.30 | 1.45 | 0.93 |
| 292 | RN | 1.30 | 1.43 | 1.00 |
| 293 | GR | 1.30 | 1.44 | 0.98 |
| 294 | LD | 1.30 | 1.36 | 1.01 |
| 295 | GT | 1.30 | 1.43 | 1.00 |
| 296 | GM | 1.30 | 1.42 | 0.98 |
| 297 | NA | 1.30 | 1.48 | 1.00 |
| 298 | CN | 1.30 | 1.42 | 0.99 |
| 299 | RE | 1.30 | 1.44 | 1.06 |
| 300 | AQ | 1.30 | 1.51 | 0.97 |
| 301 | NH | 1.29 | 1.49 | 1.05 |
| 302 | AM | 1.29 | 1.40 | 0.99 |
| 303 | QP | 1.29 | 1.39 | 0.99 |
| 304 | HN | 1.29 | 1.43 | 1.04 |
| 305 | MA | 1.29 | 1.40 | 0.96 |
| 306 | NS | 1.29 | 1.45 | 1.03 |
| 307 | LQ | 1.29 | 1.33 | 1.00 |
| 308 | LE | 1.29 | 1.37 | 1.00 |
| 309 | NK | 1.29 | 1.45 | 0.99 |
| 310 | QR | 1.29 | 1.48 | 0.98 |
| 311 | PD | 1.29 | 1.36 | 0.99 |
| 312 | SE | 1.29 | 1.49 | 1.03 |
| 313 | PA | 1.29 | 1.39 | 0.97 |
| 314 | SQ | 1.29 | 1.43 | 1.01 |
| 315 | TQ | 1.29 | 1.44 | 1.01 |
| 316 | AA | 1.29 | 1.44 | 0.94 |
| 317 | CQ | 1.29 | 1.38 | 0.98 |
| 318 | PQ | 1.29 | 1.35 | 1.00 |
| 319 | MD | 1.29 | 1.46 | 0.99 |
| 320 | HD | 1.29 | 1.49 | 1.04 |
| 321 | VD | 1.29 | 1.38 | 1.00 |
| 322 | EV | 1.28 | 1.50 | 0.97 |
| 323 | YE | 1.28 | 1.31 | 1.03 |
| 324 | AH | 1.28 | 1.45 | 1.00 |
| 325 | RD | 1.28 | 1.39 | 1.05 |
| 326 | QS | 1.28 | 1.45 | 1.01 |
| 327 | RQ | 1.28 | 1.39 | 1.02 |
| 328 | HG | 1.28 | 1.44 | 1.00 |
| 329 | AS | 1.28 | 1.42 | 0.98 |
| 330 | NC | 1.28 | 1.38 | 0.98 |
| 331 | GC | 1.28 | 1.36 | 0.98 |
| 332 | GN | 1.28 | 1.46 | 0.99 |
| 333 | MQ | 1.28 | 1.37 | 1.01 |
| 334 | NP | 1.28 | 1.37 | 0.98 |
| 335 | QI | 1.28 | 1.33 | 1.01 |
| 336 | AN | 1.28 | 1.46 | 0.98 |
| 337 | DS | 1.27 | 1.51 | 1.00 |
| 338 | QD | 1.27 | 1.48 | 1.03 |
| 339 | MN | 1.27 | 1.39 | 0.98 |
| 340 | DQ | 1.27 | 1.54 | 1.00 |
| 341 | QT | 1.27 | 1.46 | 1.00 |
| 342 | DY | 1.27 | 1.44 | 0.99 |
| 343 | ES | 1.27 | 1.49 | 0.99 |
| 344 | PE | 1.27 | 1.37 | 0.98 |
| 345 | HQ | 1.27 | 1.42 | 1.02 |
| 346 | SG | 1.26 | 1.35 | 1.00 |
| 347 | EG | 1.26 | 1.49 | 0.96 |
| 348 | DD | 1.26 | 1.53 | 0.98 |
| 349 | CD | 1.26 | 1.37 | 0.99 |
| 350 | GH | 1.26 | 1.42 | 0.99 |
| 351 | IN | 1.26 | 1.30 | 1.00 |
| 352 | EC | 1.26 | 1.48 | 0.99 |
| 353 | EP | 1.26 | 1.43 | 0.97 |
| 354 | QK | 1.26 | 1.41 | 0.99 |
| 355 | QA | 1.26 | 1.43 | 0.98 |
| 356 | GQ | 1.26 | 1.44 | 0.97 |
| 357 | EL | 1.26 | 1.42 | 0.97 |
| 358 | VQ | 1.26 | 1.34 | 1.00 |
| 359 | DL | 1.25 | 1.38 | 0.99 |
| 360 | DK | 1.25 | 1.45 | 1.01 |
| 361 | AE | 1.25 | 1.44 | 0.97 |
| 362 | NQ | 1.25 | 1.46 | 1.01 |
| 363 | EK | 1.25 | 1.50 | 0.99 |
| 364 | NN | 1.25 | 1.44 | 1.00 |
| 365 | QQ | 1.25 | 1.47 | 1.00 |
| 366 | DI | 1.25 | 1.40 | 0.98 |
| 367 | DR | 1.25 | 1.48 | 1.01 |
| 368 | DH | 1.24 | 1.48 | 1.01 |
| 369 | HE | 1.24 | 1.41 | 1.03 |
| 370 | ND | 1.24 | 1.43 | 1.02 |
| 371 | ER | 1.24 | 1.47 | 1.01 |
| 372 | NG | 1.24 | 1.40 | 0.99 |
| 373 | DG | 1.24 | 1.42 | 0.97 |
| 374 | DT | 1.23 | 1.43 | 1.01 |
| 375 | EI | 1.23 | 1.37 | 0.97 |
| 376 | EM | 1.23 | 1.45 | 0.97 |
| 377 | QH | 1.23 | 1.41 | 1.02 |
| 378 | DV | 1.23 | 1.39 | 0.99 |
| 379 | DM | 1.23 | 1.43 | 0.96 |
| 380 | QE | 1.23 | 1.45 | 1.01 |
| 381 | DC | 1.23 | 1.42 | 0.98 |
| 382 | DN | 1.23 | 1.47 | 0.98 |
| 383 | GD | 1.23 | 1.38 | 0.99 |
| 384 | GE | 1.23 | 1.39 | 0.98 |
| 385 | AR | 1.23 | 1.38 | 0.97 |
| 386 | ME | 1.23 | 1.37 | 0.98 |
| 387 | DA | 1.22 | 1.39 | 0.98 |
| 388 | EA | 1.22 | 1.41 | 0.96 |
| 389 | ED | 1.22 | 1.46 | 0.97 |
| 390 | QN | 1.22 | 1.41 | 1.00 |
| 391 | QG | 1.22 | 1.36 | 0.97 |
| 392 | DP | 1.22 | 1.36 | 0.97 |
| 393 | NE | 1.21 | 1.40 | 1.01 |
| 394 | DE | 1.21 | 1.45 | 0.96 |
| 395 | EE | 1.21 | 1.45 | 0.98 |
| 396 | EQ | 1.21 | 1.42 | 1.00 |
| 397 | EY | 1.21 | 1.32 | 0.99 |
| 398 | ET | 1.21 | 1.40 | 0.97 |
| 399 | EN | 1.20 | 1.42 | 0.96 |
| 400 | EH | 1.19 | 1.38 | 1.00 |
